# Supplementary material for: The Risk of Second Primary Cancers in Prostate Cancer Survivors Treated in the Modern Radiotherapy Era
Source: PubMed Central journal article supplement (PMC7691574; doi:10.3389/fonc.2020.605119), 2020-11-13
Supplement: DataSheet_1.pdf [file DataSheet_1.pdf]

**Online Supplementary File 1.** Cancer site, ICD10 code, and applied tumour grouping for analysis.

| <b>Subsite malignant cancer</b>                | <b>ICD10 code</b> | <b>Tumor type</b>      | <b>Pelvis/nonpelvis</b> | <b>Region</b> |
|------------------------------------------------|-------------------|------------------------|-------------------------|---------------|
| <b>Lip, oral cavity and pharynx</b>            | C0-C14            |                        | Nonpelvis               |               |
| <b>Nasal cavity, middle ear, sinuses</b>       | C30,C31           |                        | nonpelvis               |               |
| <b>Larynx</b>                                  | C32               |                        | nonpelvis               |               |
| <b>Eye and adnexa</b>                          | C69               |                        | nonpelvis               |               |
| <b>Meninges</b>                                | C70               | Central Nervous System | nonpelvis               |               |
| <b>Brain</b>                                   | C71               | Central Nervous System | nonpelvis               |               |
| <b>Pineal Gland</b>                            | C75               | Central Nervous System | nonpelvis               |               |
| <b>Spinal cord/other parts CNS</b>             | C72               | Central Nervous System | nonpelvis               |               |
| <b>Thyroid gland</b>                           | C73               |                        | nonpelvis               |               |
| <b>Esophagus</b>                               | C15               | gastrointestinal       | nonpelvis               | chest         |
| <b>Stomach</b>                                 | C16               | gastrointestinal       | nonpelvis               | abdomen       |
| <b>Small Intestine</b>                         | C17               | gastrointestinal       | nonpelvis               | abdomen       |
| <b>Colon</b>                                   | C18               | gastrointestinal       | nonpelvis               | abdomen       |
| <b>Appendix</b>                                | C18.1             | gastrointestinal       | nonpelvis               | abdomen       |
| <b>Rectum + rectosigmoid</b>                   | C19,C20           | gastrointestinal       | pelvis                  | pelvis        |
| <b>Anus, anal canal</b>                        | C21               | gastrointestinal       | pelvis                  | pelvis        |
| <b>Liver, gallbladder &amp; billiary tract</b> | C22-C24           | gastrointestinal       | nonpelvis               | abdomen       |
| <b>Pancreas</b>                                | C25               | gastrointestinal       | nonpelvis               | abdomen       |
| <b>Penis</b>                                   | C60               | genitourinary tract    | pelvis                  | pelvis        |
| <b>Testis &amp; other male genitalia</b>       | C62,C63           | genitourinary tract    | pelvis                  | pelvis        |
| <b>Kidney</b>                                  | C64               | genitourinary tract    | nonpelvis               | abdomen       |
| <b>Renal pelvis</b>                            | C65               | genitourinary tract    | nonpelvis               | abdomen       |
| <b>Bladder</b>                                 | C67               | genitourinary tract    | pelvis                  | pelvis        |
| <b>Ureter</b>                                  | C66               | genitourinary tract    | nonpelvis               | abdomen       |
| <b>Urethra</b>                                 | C68               | genitourinary tract    | pelvis                  | pelvis        |

|                                                 |                 |             |           |         |
|-------------------------------------------------|-----------------|-------------|-----------|---------|
| <b>Trachea</b>                                  | C33             |             | nonpelvis | chest   |
| <b>Lung &amp; bronchus</b>                      | C34             |             | nonpelvis | chest   |
| <b>Heart, mediastinum, pleura</b>               | C38             |             | nonpelvis | chest   |
| <b>Pleuramesothelioma</b>                       | C38.4           |             | nonpelvis | chest   |
| <b>Thymus</b>                                   | C37             |             | nonpelvis | chest   |
| <b>Breast</b>                                   | C50             |             | nonpelvis | chest   |
| <b>Bone limbs</b>                               | C40             |             | nonpelvis |         |
| <b>Pelvic bones</b>                             | C41.4           |             | pelvis    | pelvis  |
| <b>Other bones</b>                              | C41.0/1/2/3/8/9 |             | nonpelvis |         |
| <b>Kaposi sarcoma</b>                           | C46             | soft tissue | nonpelvis |         |
| <b>Peripheral nervous system</b>                | C47             | soft tissue | nonpelvis |         |
| <b>(Retro)peritoneum</b>                        | C48             | soft tissue | nonpelvis | abdomen |
| <b>Other soft tissue - headneck</b>             | C49.0           | soft tissue | nonpelvis |         |
| <b>Other soft tissue - limbs</b>                | C49.1, C49.2    | soft tissue | nonpelvis |         |
| <b>Other soft tissue - thorax</b>               | C49.3           | soft tissue | nonpelvis | chest   |
| <b>Other soft tissue - abdomen</b>              | C49.4           | soft tissue | nonpelvis | abdomen |
| <b>Other soft tissue - pelvis</b>               | C49.5           | soft tissue | pelvis    | pelvis  |
| <b>Other soft tissue - unspecified/overlap</b>  | C49.6-C49.9     | soft tissue | nonpelvis |         |
| <b>Unknown primary -description pelvis</b>      | C80             |             | pelvis    | pelvis  |
| <b>Unknown primary - unclear/outside pelvis</b> | C80             |             | nonpelvis |         |

**Online Supplementary File 2.** Estimated sHRs (sensitivity analysis) when other treatment-related factors are added to the baseline model (age, calendar period, technique) for the primary endpoint of non-pelvic second primary cancer. Abbreviations: sHR = subhazard ratio, CI=confidence interval.

| Treatment characteristic                  | Fine & Gray Model              |         | Estimated sHR for IMRT vs 3DCRT |
|-------------------------------------------|--------------------------------|---------|---------------------------------|
|                                           | sHR additional factor (95% CI) | p-value |                                 |
| Baseline model                            | -                              |         | 1.56                            |
| +Seminal vesicle dose<br>≥50 Gy vs 0 Gy   | 0.97 (0.66-1.42)               | 0.9     | 1.56                            |
| +Prostate dose<br>78 Gy vs 72 Gy          | 0.94 (0.58-1.54)               | 0.8     | 1.57                            |
| +Hormonal therapy<br>yes vs no            | 0.90 (0.66-1.22)               | 0.5     | 1.57                            |
| +Setup verification<br>online vs offline  | 1.04 (0.59-1.86)               | 0.9     | 1.52                            |
| Baseline model for 78 Gy<br>subgroup only |                                |         | 1.53                            |
